# Supplementary material for: Excellent stability of thicker shell CdSe@ZnS/ZnS quantum dots
Source: Royal Society of Chemistry journal article supplement (doi:10.1039/c7ra06957j), 2017-01-01
Supplement: c7ra06957j1.pdf [file c7ra06957j1.pdf]

## Supporting Information

### Excellent Stability of Thicker Shell CdSe@ZnS/ZnS Quantum Dots

Yan Fu<sup>1</sup>, Daekyoung Kim<sup>2</sup>, Wei Jiang<sup>1</sup>, Wenping Yin<sup>3</sup>, Tae Kyu Ahn<sup>3</sup> and

Heeyeop Chae<sup>1,2,\*</sup>

<sup>1</sup> School of Chemical Engineering, Sungkyunkwan University (SKKU), Suwon, 16419, Republic of Korea

<sup>2</sup> Sungkyunk Advanced Institute of Nanotechnology (SAINT), Sungkyunkwan University (SKKU), Suwon, 16419,

Republic of Korea

<sup>3</sup> Department of Energy Science, Sungkyunkwan University (SKKU), Suwon, 16419, Republic of Korea

\*Corresponding author

E-mail address:hchae@skku.edu ( H. Chae)

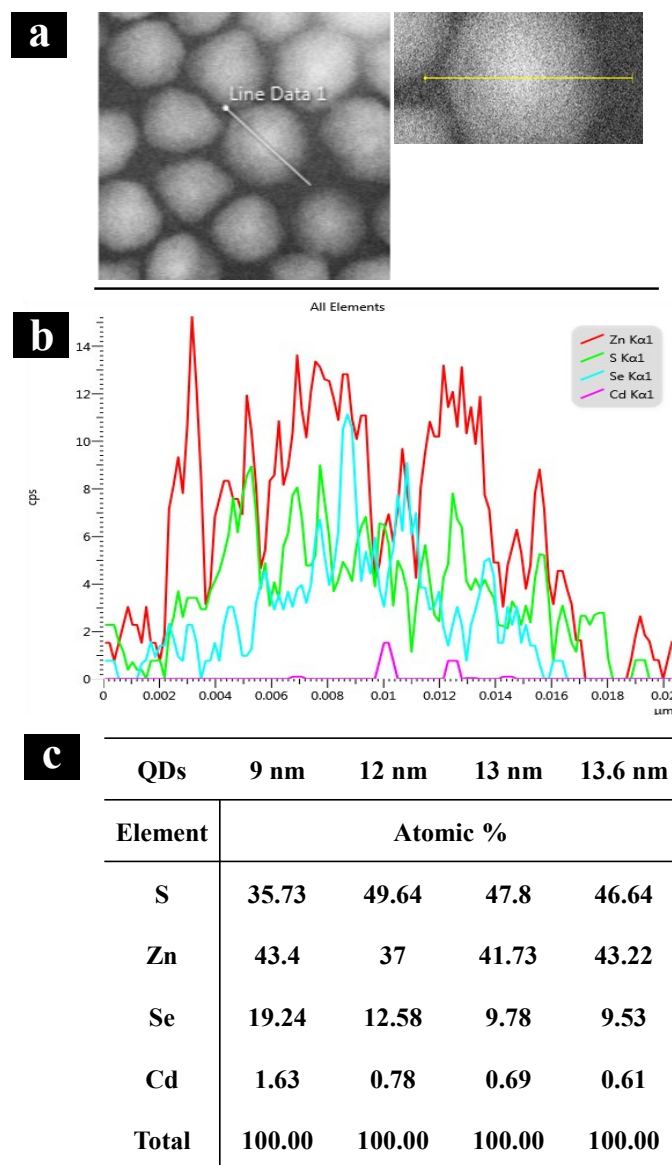

**Fig. S1.** (a) TEM-EDS line scan along a single CdSe@ZnS A- QDs. (b) EDS mapping of CdSe@ZnS A- QDs\_9 nm QDs. (c) The atomic percentage of each element of thick shell QDs is presented in table.

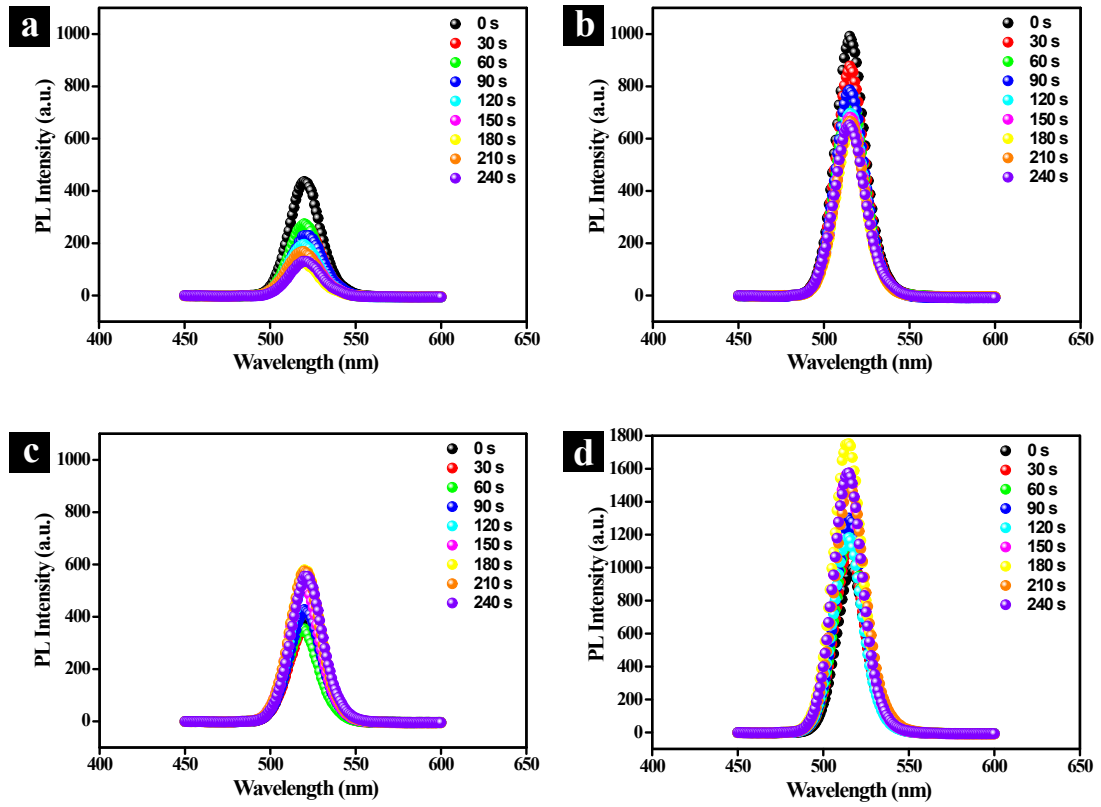

**Fig. S2.** Photochemical stability of the PL relative intensity of (a) A-QDs film under UV-irradiation exposure in O<sub>2</sub> environment; (b) AS-QDs film under UV-irradiation exposure in O<sub>2</sub> environment; (c) A-QDs film under UV-irradiation exposure in air environment; (d) AS-QDs film under UV-irradiation exposure in air environment.
